# Supplementary material for: Schisandrin B alleviates testicular inflammation and Sertoli cell apoptosis via AR-JNK pathway
Source: PubMed Central journal article supplement — Sci Rep. 2024 Aug 8;14:18418. doi: 10.1038/s41598-024-69389-1 (PMC11310458; doi:10.1038/s41598-024-69389-1), 2024-08-08
Supplement: 41598_2024_69389_MOESM1_ESM.pdf [file 41598_2024_69389_MOESM1_ESM.pdf]

Fig. 2 ZO-1

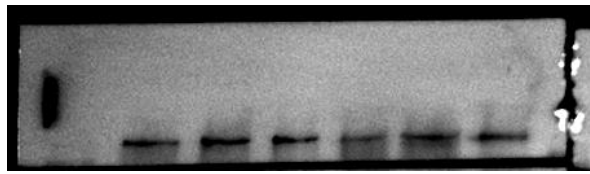

— 220 kDa

Fig.2  $\beta$ -actin

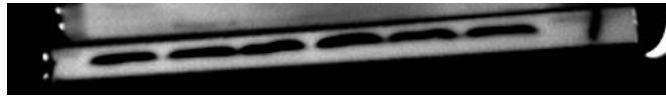

— 42 kDa

|      |   |   |    |   |    |    |
|------|---|---|----|---|----|----|
| LPS  | - | - | -  | + | +  | +  |
| SchB | - | - | 80 | - | 40 | 80 |
| Oil  | - | + | -  | - | -  | -  |

Fig.3 iNOS

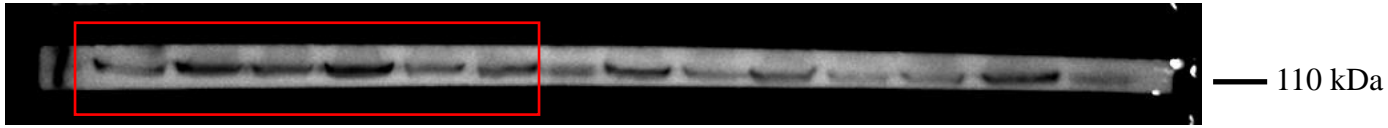

|      |   |   |    |   |    |    |
|------|---|---|----|---|----|----|
| LPS  | - | - | -  | + | +  | +  |
| SchB | - | - | 80 | - | 40 | 80 |
| Oil  | - | + | -  | - | -  | -  |

Fig.3 COX-2

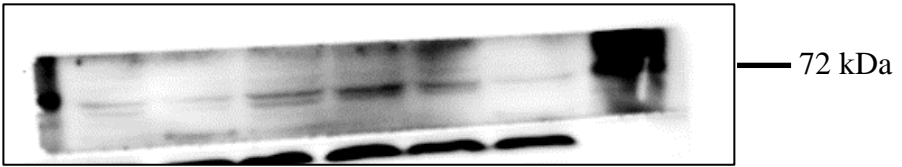

|      |   |   |    |   |    |    |
|------|---|---|----|---|----|----|
| LPS  | - | - | -  | + | +  | +  |
| SchB | - | - | 80 | - | 40 | 80 |
| Oil  | - | + | -  | - | -  | -  |

Fig.3  $\beta$ -actin

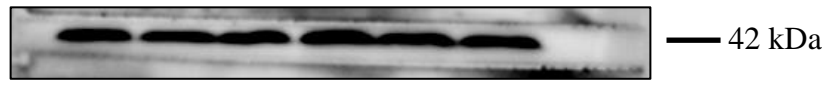

|      |   |   |    |   |    |    |
|------|---|---|----|---|----|----|
| LPS  | - | - | -  | + | +  | +  |
| SchB | - | - | 80 | - | 40 | 80 |
| Oil  | - | + | -  | - | -  | -  |

Fig.4 iNOS

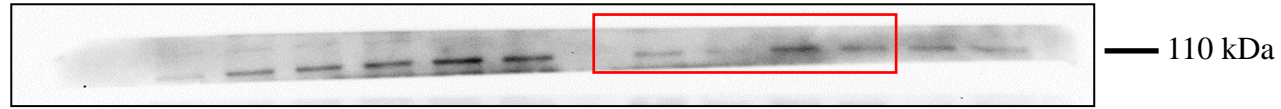

|                  |   |   |   |   |
|------------------|---|---|---|---|
| LPS              | - | - | + | + |
| SchB (5 $\mu$ M) | - | + | - | + |

Fig.4 COX-2

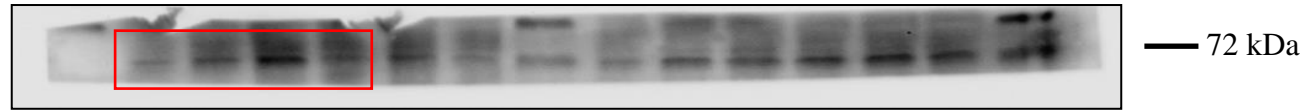

|                  |   |   |   |   |
|------------------|---|---|---|---|
| LPS              | - | - | + | + |
| SchB (5 $\mu$ M) | - | + | - | + |

Fig.4  $\beta$ -actin

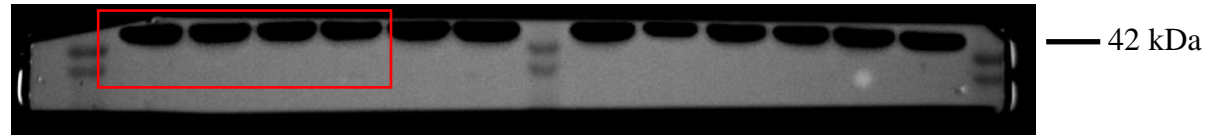

|                  |   |   |   |   |
|------------------|---|---|---|---|
| LPS              | - | - | + | + |
| SchB (5 $\mu$ M) | - | + | - | + |

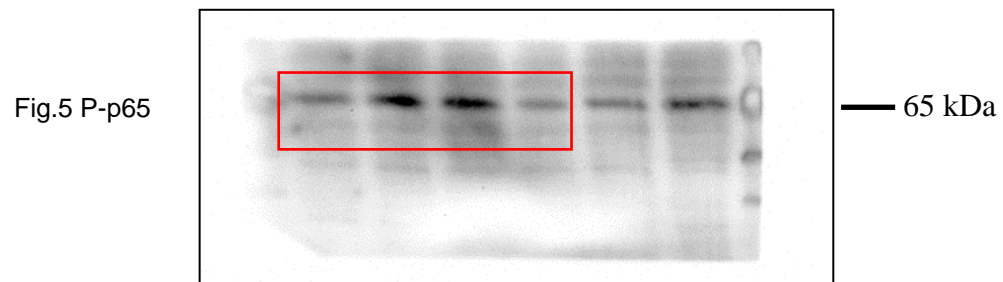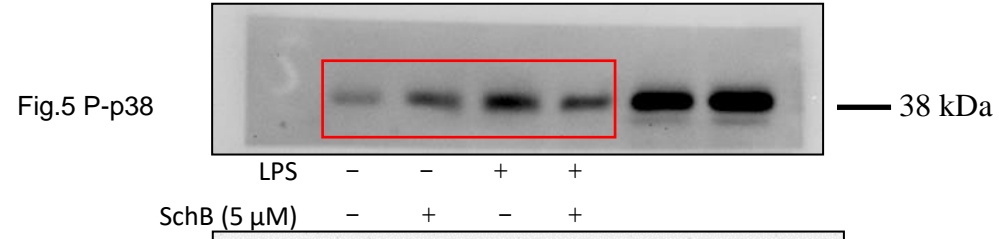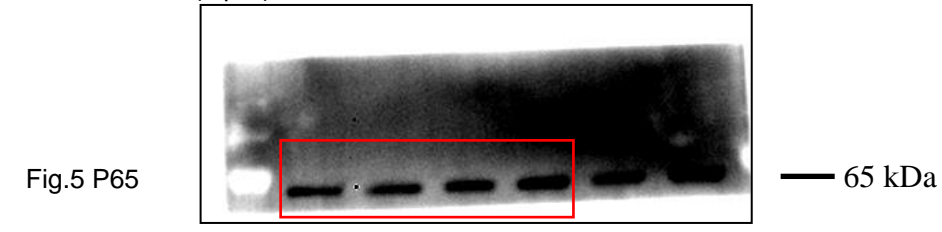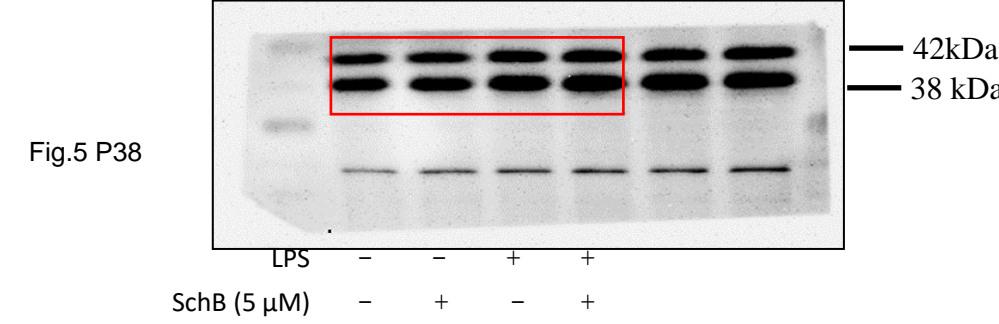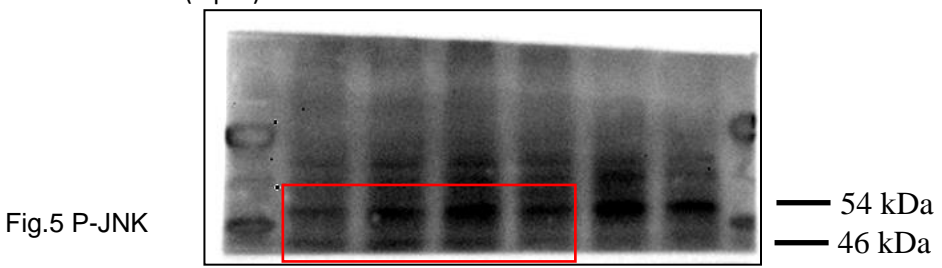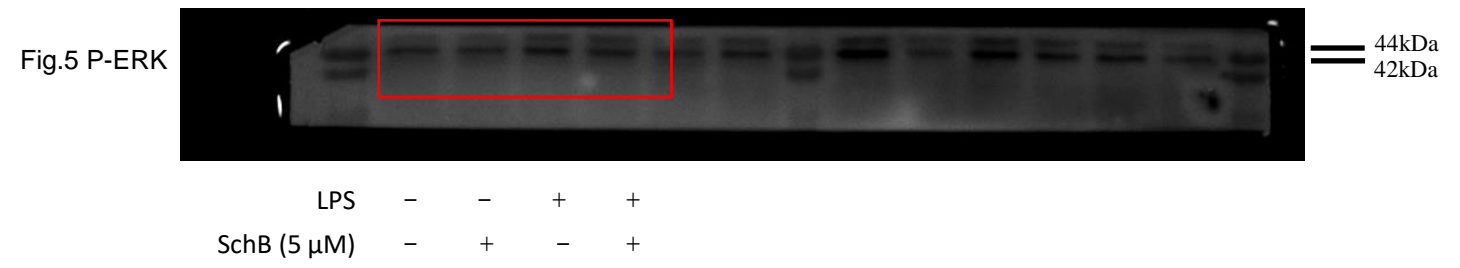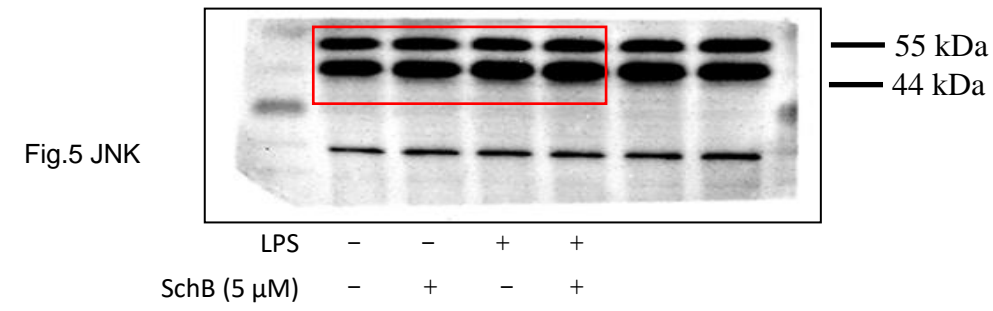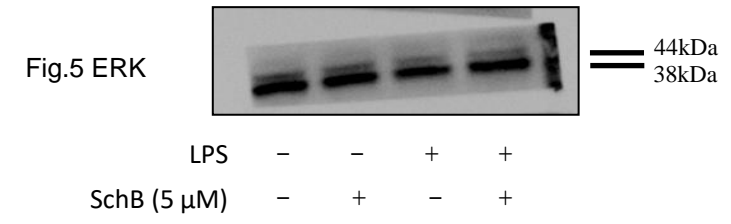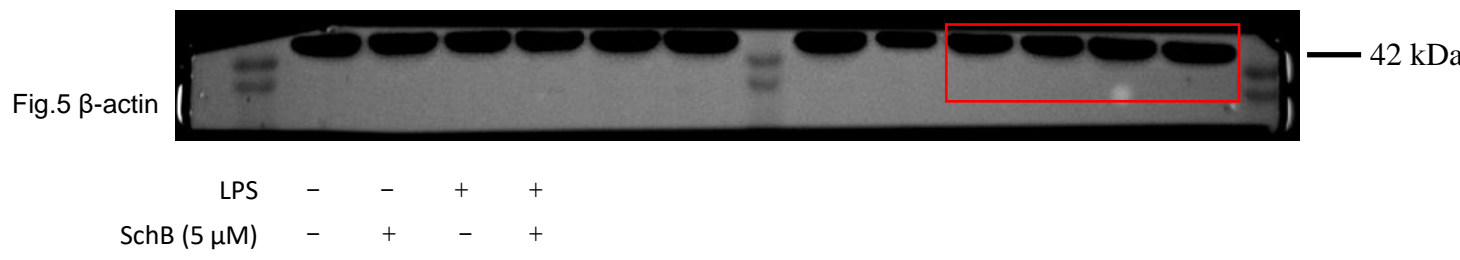

Fig.6 Bax

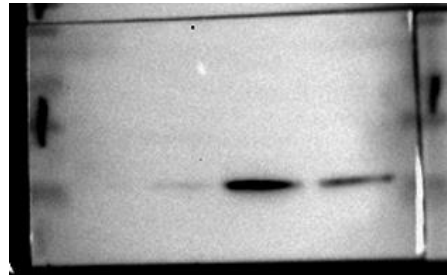

— 20 kDa

|                  |   |   |   |   |
|------------------|---|---|---|---|
| LPS              | - | - | + | + |
| SchB (5 $\mu$ M) | - | + | - | + |

Fig.7 Bax

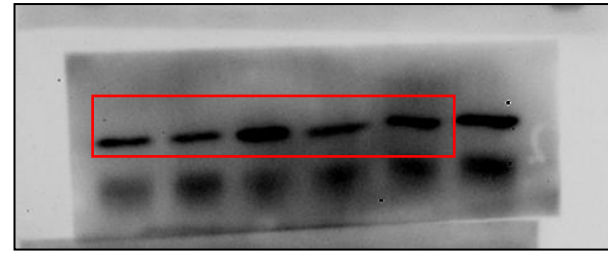

— 20 kDa

Fig.6 Bcl2

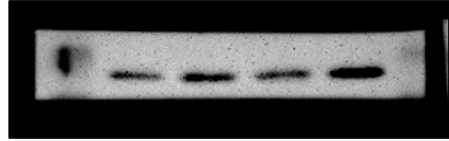

— 25 kDa

|                  |   |   |   |   |
|------------------|---|---|---|---|
| LPS              | - | - | + | + |
| SchB (5 $\mu$ M) | - | + | - | + |

Fig.7 Bcl2

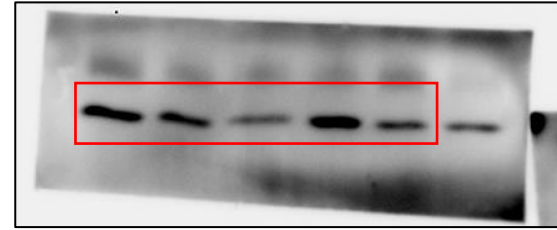

— 25 kDa

Fig.6 Pro-caspase-3

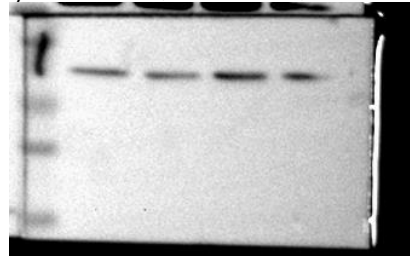

— 30 kDa

|                  |   |   |   |   |
|------------------|---|---|---|---|
| LPS              | - | - | + | + |
| SchB (5 $\mu$ M) | - | + | - | + |

Fig.7 Pro-caspase-3

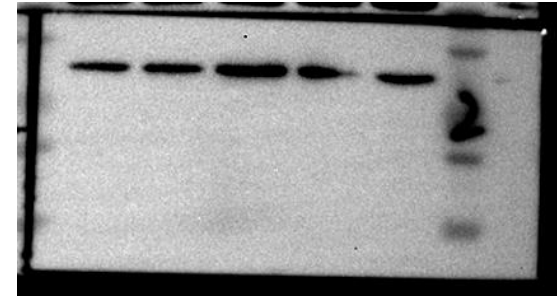

— 30 kDa

Fig.7  $\beta$ -actin

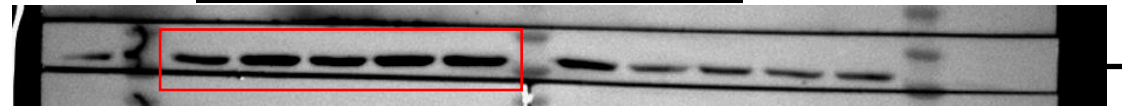

— 42 kDa

|                        |   |   |   |   |   |
|------------------------|---|---|---|---|---|
| LPS                    | - | - | + | + | + |
| SchB (5 $\mu$ M)       | - | + | - | + | + |
| Anisomycin (5 $\mu$ M) | - | - | - | - | + |

Fig.6  $\beta$ -actin

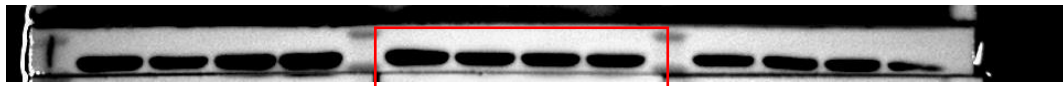

— 42 kDa

|                  |   |   |   |   |
|------------------|---|---|---|---|
| LPS              | - | - | + | + |
| SchB (5 $\mu$ M) | - | + | - | + |

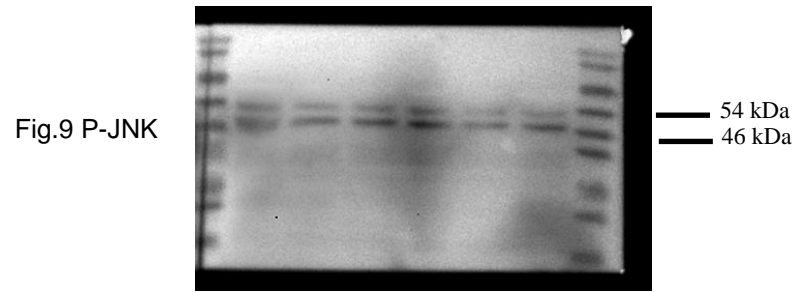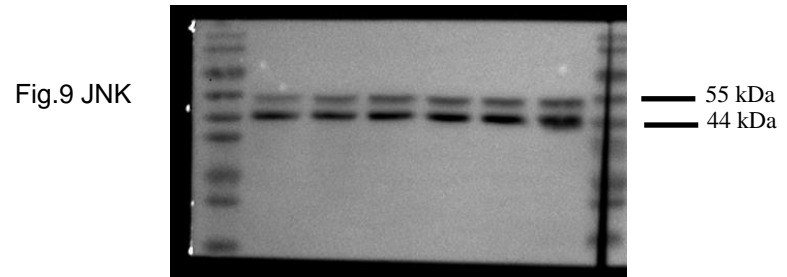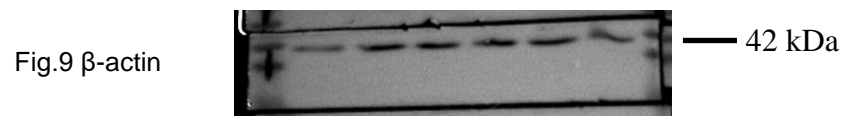

|      |   |   |   |   |   |   |
|------|---|---|---|---|---|---|
| LPS  | - | - | - | + | + | + |
| SchB | - | + | - | - | + | + |
| BMS  | - | - | + | - | - | + |

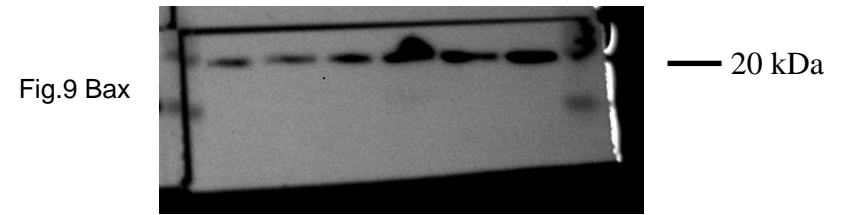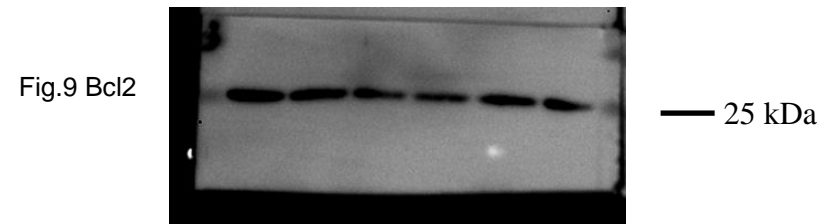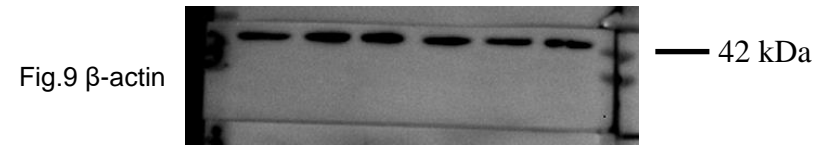

|      |   |   |   |   |   |   |
|------|---|---|---|---|---|---|
| LPS  | - | - | - | + | + | + |
| SchB | - | + | - | - | + | + |
| BMS  | - | - | + | - | - | + |
