# Supplementary material for: Schisandrin B alleviates testicular inflammation and Sertoli cell apoptosis via AR-JNK pathway
Source: PubMed Central journal article supplement — Sci Rep. 2024 Aug 8;14:18418. doi: 10.1038/s41598-024-69389-1 (PMC11310458; doi:10.1038/s41598-024-69389-1), 2024-08-08
Supplement: 41598_2024_69389_MOESM2_ESM.pdf [file 41598_2024_69389_MOESM2_ESM.pdf]

| ene_symbol | exp_C3NC_1 | exp_C3NC_2 | exp_C3NC_3 | exp_CM5_1 | exp_CM5_2 | exp_CM5_3 | exp_TM3NC_1 | exp_TM3NC_2 | exp_TM3NC_3 | exp_TMM5_1 | exp_TMM5_2 | exp_TMM5_3 |
|------------|------------|------------|------------|-----------|-----------|-----------|-------------|-------------|-------------|------------|------------|------------|
| Hrh1       | 0.05       | 0.05       | 0.09       | 0         | 0.03      | 0.12      | 0           | 0           | 0           | 0          | 0          | 0.02       |
| Ephx2      | 0          | 0          | 0          | 0         | 0         | 0         | 0.06        | 0.03        | 0.06        | 0          | 0.03       | 0.09       |
| Ptgdr      | 0          | 0          | 0          | 0         | 0         | 0         | 0.21        | 0.15        | 0.02        | 0          | 0.02       | 0.04       |
| Fnta       | 58.88      | 55.47      | 47.16      | 57.1      | 57.16     | 57.69     | 52.7        | 55.01       | 59.9        | 64.89      | 63.8       | 60.31      |
| Aph1b      | 5.35       | 4.98       | 5.91       | 4.94      | 4.74      | 6.44      | 1.89        | 1.98        | 4.02        | 4.45       | 4          | 3.94       |
| Ptger2     | 0          | 0          | 0          | 0         | 0         | 0         | 0.08        | 0.06        | 0           | 0          | 0          | 0.03       |
| Adrb2      | 0.69       | 0.34       | 0.74       | 0.56      | 0.73      | 0.69      | 0.47        | 0.43        | 0.21        | 0.28       | 0.41       | 0.46       |
| Vdr        | 19.23      | 20.99      | 18.34      | 20.45     | 21.36     | 17.33     | 0.25        | 0.37        | 0.38        | 0.58       | 0.64       | 0.49       |
| Pla2g1b    | 0.14       | 0          | 0.3        | 0         | 0         | 0         | 0           | 0           | 0           | 0          | 0          | 0          |
| Mmp2       | 99.26      | 97.27      | 105.55     | 85.05     | 86.15     | 84.18     | 104.59      | 103.72      | 137.4       | 136.05     | 141.55     | 111.79     |
| Btk        | 0.02       | 0          | 0          | 0         | 0         | 0         | 0.02        | 0           | 0.02        | 0          | 0          | 0          |
| Ptger4     | 0.67       | 0.63       | 0.59       | 1.16      | 1.17      | 0.73      | 1.3         | 1.28        | 3.97        | 4.17       | 3.99       | 3.58       |
| Pde4b      | 7.95       | 7.85       | 11.57      | 9.73      | 9.46      | 11.92     | 9.64        | 9.48        | 7.75        | 8.58       | 9.51       | 8.41       |
| Pde8b      | 0.21       | 0.16       | 0.24       | 0.1       | 0.16      | 0.2       | 0.32        | 0.34        | 0.28        | 0.36       | 0.32       | 0.2        |
| Lgmn       | 159.68     | 160        | 191.01     | 174.22    | 175.33    | 193.77    | 68.36       | 67.66       | 62.35       | 68.31      | 72.8       | 67.42      |
| Clk1       | 19.85      | 19.5       | 22.58      | 23.66     | 24.54     | 26.17     | 26.23       | 26.49       | 15.29       | 23.51      | 23.77      | 17.7       |
| Plk4       | 29.59      | 30.3       | 31.67      | 28.17     | 28.54     | 31.16     | 23.79       | 24.39       | 31.81       | 36.75      | 35.26      | 34.6       |
| Bdkrb2     | 0.39       | 0.39       | 0.27       | 0.4       | 0.5       | 0.66      | 17.04       | 17.3        | 20.3        | 20.41      | 21.21      | 17.04      |
| Lck        | 0.57       | 0.51       | 1.24       | 0.99      | 0.77      | 1.73      | 3.11        | 2.89        | 1.02        | 0.96       | 0.97       | 0.65       |
| Dpp4       | 0.09       | 0.11       | 0.15       | 0.06      | 0.07      | 0.14      | 0.08        | 0.13        | 0.02        | 0.04       | 0.02       | 0.04       |
| Abcc1      | 12.29      | 13.99      | 15.57      | 11.65     | 11.87     | 14.39     | 27.62       | 28.3        | 27.53       | 26.63      | 27.17      | 28.14      |
| Ccr3       | 0          | 0          | 0          | 0         | 0.03      | 0         | 0           | 0           | 0           | 0          | 0          | 0          |
| Bmp1       | 24.94      | 25.48      | 27.6       | 26.17     | 26.54     | 26.84     | 12.17       | 13.19       | 17.68       | 19.15      | 20.41      | 16.34      |
| Scn9a      | 0          | 0          | 0          | 0         | 0         | 0         | 0           | 0           | 0           | 0          | 0          | 0          |
| Fbp1       | 0.04       | 0          | 0          | 0         | 0         | 0         | 0           | 0           | 0           | 0          | 0          | 0          |
| Mapkapk2   | 46.74      | 45.06      | 43.08      | 45.8      | 44.68     | 47.08     | 54.5        | 55.36       | 75.02       | 78.65      | 82.32      | 70.81      |
| Ctsg       | 0.07       | 0          | 0          | 0         | 0         | 0         | 0           | 0           | 0           | 0          | 0          | 0          |
| Akt1       | 133.59     | 129.45     | 91.12      | 126.36    | 130.98    | 97.91     | 61.58       | 60.06       | 117.38      | 115.18     | 114.32     | 125.39     |
| Ptafr      | 0          | 0          | 0.03       | 0         | 0         | 0         | 0.02        | 0           | 0           | 0          | 0          | 0          |
| Mapk11     | 6.17       | 6.21       | 6.77       | 6.78      | 6.51      | 7.7       | 8.47        | 8.24        | 8.28        | 8          | 8.96       | 8.1        |
| Nos2       | 0.11       | 0.09       | 0.2        | 0.04      | 0.1       | 0.08      | 14.96       | 13.53       | 12.54       | 12.8       | 12.8       | 8.11       |
| Cdk5       | 14.26      | 13.96      | 21.46      | 14.92     | 14.29     | 18.46     | 13.53       | 13.18       | 16.72       | 15         | 15.94      | 15.23      |
| Psmb5      | 128.36     | 123.79     | 118.12     | 124.43    | 118.41    | 116.35    | 143.08      | 127.39      | 123.16      | 121.58     | 131.71     | 129.7      |
| Hdac6      | 12.83      | 12.8       | 12.77      | 12.64     | 14.01     | 12.69     | 7.19        | 6.72        | 11.15       | 10.85      | 10.61      | 10.89      |
| Kdr        | 0.39       | 0.62       | 0.67       | 0.57      | 0.52      | 0.7       | 0.08        | 0.12        | 0.03        | 0.07       | 0          | 0.03       |

|         |       |       |       |       |       |       |       |       |       |       |       |       |
|---------|-------|-------|-------|-------|-------|-------|-------|-------|-------|-------|-------|-------|
| Kcnh2   | 11.42 | 12.34 | 15.54 | 11.93 | 11.6  | 11.05 | 4.1   | 4.27  | 6.44  | 5.32  | 6.01  | 6.1   |
| Hcrtr2  | 0     | 0     | 0     | 0     | 0     | 0     | 0.02  | 0     | 0     | 0     | 0     | 0.02  |
| Plau    | 0.03  | 0.03  | 0.06  | 0.06  | 0.06  | 0     | 14    | 14.96 | 48.58 | 46.16 | 44.8  | 59.75 |
| Eif2ak2 | 25.02 | 24.93 | 24.56 | 28.34 | 28.38 | 28.09 | 22.89 | 22.83 | 16.07 | 21.86 | 22.1  | 15.73 |
| Car15   | 0.33  | 0.38  | 0.29  | 0.05  | 0.05  | 0.25  | 0.28  | 0.32  | 0.25  | 0.43  | 0.28  | 0.18  |
| Htr1b   | 0.75  | 0.53  | 0.48  | 1.11  | 1.36  | 0.48  | 1.5   | 1.63  | 2.19  | 2.57  | 2.81  | 2.59  |
| Nqo2    | 10    | 9.37  | 8.25  | 10.56 | 10.4  | 9.75  | 7.26  | 7.2   | 9.45  | 9.77  | 9.55  | 10.31 |
| Clk3    | 19.57 | 18.93 | 21.79 | 18.65 | 17.67 | 22.09 | 31.15 | 29.14 | 38.94 | 46.6  | 49.78 | 39.57 |
| Fen1    | 64.79 | 61.33 | 40.44 | 60.64 | 60.89 | 40.89 | 10.71 | 10.74 | 35.08 | 38.78 | 39.39 | 40.7  |
| Grm1    | 0.07  | 0.02  | 0.02  | 0.04  | 0.05  | 0.04  | 0     | 0     | 0     | 0     | 0     | 0     |
| Adra2b  | 0     | 0     | 0     | 0     | 0.02  | 0     | 0     | 0     | 0     | 0     | 0     | 0     |
| Slc9a1  | 12.85 | 13.69 | 14.6  | 12.96 | 13.03 | 13.93 | 11.79 | 10.22 | 12.69 | 11.84 | 12.93 | 11.3  |
| Nod1    | 9.3   | 9.9   | 10.78 | 9.2   | 9.55  | 8.77  | 1.53  | 1.93  | 3.54  | 5.39  | 5.34  | 3.91  |
| Npy1r   | 0.06  | 0.08  | 0.06  | 0.12  | 0.06  | 0.15  | 27.9  | 27.75 | 14.74 | 13.53 | 14.26 | 14.02 |
| Gmn     | 62.01 | 61.17 | 53.07 | 72.71 | 63.67 | 58.94 | 14.12 | 13.05 | 34.59 | 40.92 | 37.98 | 40.17 |
| Pik3cd  | 1.32  | 1.48  | 2.66  | 1.92  | 2.12  | 2.54  | 2.15  | 1.92  | 2.98  | 3.1   | 3.69  | 3.04  |
| Cbx1    | 63.4  | 66.73 | 60.02 | 75.48 | 72.4  | 69.72 | 37.7  | 37.25 | 42.02 | 43.72 | 43.87 | 41.78 |
| Ehmt1   | 11.64 | 12.32 | 11.24 | 11.79 | 11.05 | 10.78 | 10.29 | 10.53 | 13.03 | 14.83 | 14.55 | 13.15 |
| Sstr2   | 0.28  | 0.3   | 0.45  | 0.2   | 0.4   | 0.34  | 0     | 0     | 0     | 0     | 0     | 0     |
| Cyp26a1 | 0.17  | 0     | 0.09  | 0.04  | 0.13  | 0.13  | 0.25  | 0.36  | 0.08  | 0.04  | 0.08  | 0.04  |
| Prkcg   | 0.1   | 0.13  | 0.11  | 0.21  | 0.12  | 0.11  | 0.71  | 0.69  | 1.2   | 1.23  | 1.5   | 0.95  |
| Senp6   | 21.56 | 22.03 | 26.26 | 22.44 | 22.52 | 25.64 | 33.28 | 33.71 | 24.83 | 24.68 | 24.13 | 24.37 |
| Rcor1   | 16.12 | 16.31 | 18.11 | 18.67 | 20.76 | 20.03 | 18.78 | 18.67 | 15.6  | 16.57 | 16.21 | 15.89 |
| Trpm8   | 0.12  | 0.18  | 0.03  | 0.11  | 0.09  | 0     | 0     | 0     | 0.03  | 0     | 0     | 0     |
| Dpp8    | 19.28 | 19.6  | 25.73 | 20.9  | 22.33 | 22.74 | 21.45 | 21.72 | 23.93 | 24.58 | 24.51 | 23.5  |
| Trpv1   | 0     | 0     | 0     | 0     | 0     | 0     | 0     | 0.02  | 0     | 0     | 0     | 0     |
| Cyp11b2 | 0     | 0     | 0     | 0     | 0     | 0     | 0     | 0     | 0     | 0     | 0     | 0     |
| Ptger1  | 0.67  | 0.7   | 0.28  | 0.51  | 0.46  | 0.59  | 0.29  | 0.16  | 0.23  | 0.13  | 0.35  | 0.15  |
| Pygl    | 0     | 0     | 0     | 0     | 0     | 0     | 0     | 0     | 0.02  | 0     | 0     | 0     |
| Ache    | 0.06  | 0.06  | 0     | 0.03  | 0.03  | 0.03  | 0.12  | 0.17  | 0.21  | 0.06  | 0.03  | 0.14  |
| Htr4    | 0     | 0     | 0     | 0     | 0     | 0     | 0     | 0     | 0     | 0     | 0     | 0     |
| Cyp1a2  | 0     | 0     | 0     | 0     | 0.03  | 0     | 0     | 0     | 0     | 0     | 0     | 0     |
| Ripk2   | 11.54 | 11.63 | 12.24 | 13.64 | 14.95 | 13.59 | 8.69  | 8.23  | 7.22  | 6.96  | 7.41  | 7.21  |
| Eed     | 27.44 | 27.05 | 25.29 | 26.13 | 27.22 | 28.33 | 30.74 | 29.95 | 25.39 | 26.12 | 26.36 | 24.61 |
| Car14   | 0.41  | 0.39  | 0.81  | 0.35  | 0.34  | 0.38  | 0.16  | 0.04  | 0.11  | 0.2   | 0.08  | 0.04  |
| Chrm5   | 0     | 0.01  | 0     | 0     | 0     | 0     | 0.01  | 0     | 0     | 0     | 0     | 0     |

|          |        |        |        |        |        |        |        |        |        |        |        |        |
|----------|--------|--------|--------|--------|--------|--------|--------|--------|--------|--------|--------|--------|
| Cyp11b1  | 0      | 0      | 0      | 0      | 0      | 0.03   | 0.42   | 0.46   | 0.81   | 0.87   | 1.24   | 0.66   |
| F13a1    | 0      | 0      | 0      | 0      | 0      | 0      | 0.16   | 0.17   | 0.03   | 0.1    | 0.08   | 0.11   |
| Ctsk     | 0.04   | 0.04   | 0.04   | 0.04   | 0      | 0.04   | 10.33  | 9.45   | 5.6    | 7.81   | 6.44   | 4.89   |
| Clk2     | 7.19   | 8.29   | 8.39   | 6.11   | 5.93   | 8.7    | 11.93  | 11.59  | 12.08  | 13.07  | 14.05  | 11.85  |
| Cdk2     | 45.75  | 46.62  | 44.37  | 48.46  | 47.71  | 49.25  | 14.87  | 16.34  | 24.65  | 28.08  | 28.03  | 25.18  |
| Hsd17b10 | 56.88  | 53.44  | 57.12  | 54.76  | 56.14  | 58.63  | 77.72  | 74.4   | 79.56  | 77.06  | 77.77  | 81.95  |
| Csnk2a2  | 63.24  | 63.48  | 63.75  | 54.63  | 53.02  | 63.74  | 93.48  | 91.66  | 80.4   | 84.68  | 83.34  | 80.46  |
| Usp4     | 35.54  | 35.56  | 37.21  | 38.86  | 39.23  | 39.72  | 43.43  | 44.2   | 39.08  | 39.35  | 38.48  | 37.78  |
| Nfkb1    | 23.25  | 21.14  | 24.41  | 20.9   | 21.37  | 22.19  | 28.87  | 27.77  | 30.74  | 32.51  | 33.19  | 31.49  |
| F3       | 18.67  | 17.77  | 24.43  | 19.19  | 16.72  | 23.54  | 70.35  | 70.56  | 30.82  | 27.65  | 26.26  | 27.06  |
| Nos3     | 0.03   | 0.13   | 0.14   | 0.06   | 0.06   | 0.1    | 0.11   | 0.05   | 0.04   | 0.08   | 0.05   | 0.06   |
| Lta4h    | 44.76  | 43.13  | 49.24  | 45.34  | 43.62  | 50.56  | 46.21  | 43.3   | 47.3   | 50.37  | 52.57  | 49.13  |
| Metap2   | 126.9  | 122.81 | 95.45  | 122.21 | 122.59 | 105.09 | 108.76 | 108.07 | 104.51 | 103.05 | 99.35  | 110.13 |
| Dhfr     | 24.73  | 23.67  | 24.19  | 21.05  | 21.49  | 21.67  | 19.07  | 20.05  | 14.4   | 16.16  | 14.95  | 16.91  |
| Alox8    | 0.02   | 0.02   | 0.02   | 0.02   | 0      | 0.02   | 0      | 0      | 0      | 0      | 0      | 0      |
| Pnp2     | 0      | 0      | 0      | 0      | 0      | 0      | 0      | 0      | 0      | 0      | 0      | 0      |
| Ptgs1    | 19.11  | 18.71  | 29.12  | 19.3   | 19.25  | 21.55  | 129.07 | 128.04 | 97.91  | 93.48  | 97.16  | 88.14  |
| Tdp1     | 17.44  | 17.71  | 19.15  | 14.7   | 15.78  | 17.11  | 21.89  | 21.53  | 17.52  | 17.8   | 17.39  | 19.48  |
| Gsk3b    | 17.64  | 19.54  | 24.06  | 17.57  | 17.58  | 20.31  | 19.7   | 21.32  | 14.95  | 13.01  | 14.15  | 13.88  |
| Ctsb     | 214.96 | 213.86 | 301.31 | 185.2  | 177.05 | 192.21 | 668.34 | 667.31 | 508.5  | 510.51 | 519.72 | 478.85 |
| Crebbp   | 3.68   | 4.56   | 4.76   | 4.33   | 4.21   | 4.27   | 4.17   | 4.11   | 3.59   | 3.57   | 3.87   | 3.53   |
| Senp7    | 6.46   | 6.44   | 9.4    | 6.81   | 6.22   | 7.53   | 7.81   | 7.57   | 5.42   | 6.86   | 6.42   | 5.97   |
| Car13    | 42.35  | 38.61  | 48.07  | 38.43  | 39.69  | 41.59  | 41.66  | 40.9   | 28.38  | 31.17  | 31.32  | 27.89  |
| Pde9a    | 0.03   | 0      | 0.04   | 0      | 0      | 0      | 0      | 0      | 0.07   | 0      | 0.03   | 0.03   |
| Fkbp1a   | 291.24 | 280.55 | 225.37 | 287.68 | 260.13 | 243.13 | 297.23 | 296.92 | 341.94 | 351.63 | 342.85 | 353.36 |
| Fntb     | 10.89  | 10.35  | 10.84  | 11.05  | 10.06  | 10.56  | 8.24   | 7.96   | 8.86   | 7.43   | 8.92   | 8.62   |
| Itgb5    | 19.17  | 17.79  | 21.14  | 15.12  | 15.21  | 16.39  | 36.48  | 35.61  | 45.83  | 54.08  | 56.36  | 45.77  |
| Hsp90aa1 | 795.77 | 776.86 | 424.6  | 797.78 | 794.63 | 514.15 | 468.84 | 472.26 | 589.25 | 575.4  | 548.78 | 621.64 |
| Grin2a   | 0      | 0      | 0      | 0      | 0      | 0      | 0.01   | 0      | 0      | 0      | 0      | 0      |
| Polb     | 43     | 41.83  | 40.35  | 47.43  | 46.13  | 44.81  | 45.92  | 48.85  | 35.57  | 41.59  | 39.57  | 31.39  |
| Nox4     | 3      | 3.26   | 4.37   | 3.56   | 3.55   | 4.86   | 1.41   | 1.31   | 1.14   | 1.42   | 1.15   | 1.01   |
| Kcnq2    | 0      | 0      | 0      | 0      | 0      | 0      | 0      | 0      | 0      | 0      | 0      | 0      |
| Ptpn1    | 22.7   | 21.69  | 19.69  | 22.04  | 22.58  | 20.01  | 11.94  | 12.22  | 19.02  | 20.91  | 20.37  | 20.26  |
| Ptpn2    | 82.38  | 80.97  | 85.42  | 78.5   | 78.43  | 95.06  | 66.53  | 69.64  | 48.22  | 47.18  | 45.13  | 46.5   |
| Tnni3k   | 0      | 0      | 0      | 0      | 0      | 0      | 0.13   | 0.25   | 0.02   | 0.08   | 0.13   | 0.1    |
| Ptgs2    | 1.37   | 1.3    | 1.94   | 1.03   | 1.05   | 1.87   | 247.69 | 259.76 | 188.47 | 127.9  | 123.46 | 141.2  |

|         |        |        |        |        |        |        |        |        |        |        |        |        |
|---------|--------|--------|--------|--------|--------|--------|--------|--------|--------|--------|--------|--------|
| Thpo    | 0.4    | 0.49   | 0.45   | 0.21   | 0.3    | 0.46   | 0.18   | 0.41   | 0.16   | 0.11   | 0.17   | 0.12   |
| Jak2    | 12.59  | 13.37  | 14.78  | 10.38  | 11.3   | 12.13  | 8.74   | 9.87   | 10.62  | 11.23  | 11.92  | 11.06  |
| Cyp17a1 | 0      | 0      | 0      | 0      | 0      | 0      | 0      | 0      | 0      | 0      | 0      | 0      |
| Pikfyve | 3.22   | 3.29   | 4      | 3.59   | 3.91   | 3.42   | 3.64   | 3.44   | 3.87   | 3.63   | 3.67   | 3.77   |
| Aldh1a1 | 86.03  | 83.17  | 79.47  | 93.17  | 85.92  | 73.87  | 1.12   | 0.82   | 0.65   | 0.66   | 0.68   | 0.97   |
| Sstr5   | 0      | 0.02   | 0      | 0      | 0      | 0      | 0      | 0      | 0      | 0      | 0      | 0      |
| Slk     | 37.74  | 40.62  | 44.08  | 36.59  | 37.82  | 43.07  | 65.31  | 68.99  | 46.99  | 45.32  | 44.94  | 46.13  |
| Tubb5   | 772.06 | 762.96 | 631.43 | 742.74 | 739.17 | 615.71 | 329.23 | 318.03 | 748.68 | 744.18 | 761.35 | 774.84 |
| Rorc    | 1.87   | 2.13   | 6.17   | 1.69   | 1.58   | 3.39   | 0.35   | 0.23   | 0.09   | 0.21   | 0.22   | 0.13   |
| Dhodh   | 11.64  | 10.53  | 8.7    | 9.1    | 9.9    | 9.6    | 16.19  | 16.24  | 15.38  | 16.01  | 16.97  | 17     |
| Egfr    | 9.15   | 9.85   | 14.35  | 10.55  | 10.36  | 11.06  | 9.39   | 9.61   | 10.07  | 7.82   | 8.53   | 7.99   |
| Kdm5c   | 19.59  | 19.61  | 15.44  | 16.97  | 19.64  | 17.18  | 19.82  | 19.62  | 24.69  | 22.97  | 23.74  | 23.12  |
| Adrb3   | 1.54   | 1.34   | 1.96   | 1.36   | 1.45   | 1.88   | 0      | 0      | 0      | 0      | 0      | 0      |
| Qpct    | 0      | 0      | 0      | 0      | 0      | 0      | 0.03   | 0      | 0      | 0      | 0      | 0.06   |
| Atm     | 4.77   | 5.08   | 6.26   | 4.86   | 5.22   | 5.69   | 8.13   | 9.14   | 7.46   | 8.63   | 8.45   | 7.97   |
| Npy2r   | 0      | 0.02   | 0      | 0      | 0      | 0      | 0      | 0      | 0      | 0      | 0      | 0      |
| Cysl1r1 | 1.21   | 1.33   | 0.98   | 1.34   | 1.55   | 1.09   | 0      | 0      | 0      | 0      | 0      | 0      |
| Tbxas1  | 0      | 0      | 0      | 0      | 0      | 0      | 0      | 0      | 0.09   | 0.05   | 0.06   | 0      |
| Chrm4   | 0.2    | 0.25   | 0.21   | 0.32   | 0.16   | 0.21   | 0.02   | 0.02   | 0.17   | 0.14   | 0.2    | 0.22   |
| Ccr4    | 0      | 0      | 0      | 0.02   | 0      | 0      | 0      | 0.02   | 0.04   | 0.04   | 0.02   | 0      |
| Fads1   | 76.02  | 77.34  | 100.87 | 72.23  | 75.82  | 87.82  | 82.67  | 83.15  | 74.56  | 75.17  | 79.07  | 68.15  |
| Cdc7    | 17.83  | 19.33  | 17.68  | 17.74  | 18.12  | 19.37  | 9.54   | 10.08  | 14.2   | 16.45  | 17.17  | 15.56  |
| Idh1    | 11.23  | 9.2    | 9.77   | 14.1   | 13.8   | 10.48  | 10.93  | 10.52  | 28.53  | 30.07  | 30.24  | 29.62  |
| Cyp11a1 | 0      | 0      | 0      | 0      | 0      | 0      | 0.12   | 0.07   | 0.16   | 0.1    | 0.14   | 0.21   |
| Chuk    | 31.55  | 32.86  | 36.35  | 29.64  | 27.92  | 33.84  | 45.29  | 46.35  | 26.37  | 25.75  | 24.47  | 25.82  |
| Usp5    | 58.08  | 55.43  | 40.49  | 57.37  | 60.09  | 45.93  | 39.23  | 41.8   | 64.08  | 61.49  | 63.11  | 65.84  |
| F9      | 0      | 0      | 0      | 0      | 0      | 0      | 0      | 0      | 0      | 0.02   | 0      | 0      |
| Nampt   | 24.41  | 23.71  | 29.89  | 22.19  | 22.53  | 24.71  | 31.77  | 33.85  | 27.98  | 27.91  | 26.2   | 27.15  |
| Csf1r   | 0.02   | 0.07   | 0.03   | 0      | 0.08   | 0.07   | 0.02   | 0.05   | 0.05   | 0      | 0.02   | 0.1    |
| Capn1   | 15.04  | 15.74  | 17.27  | 17.46  | 18.62  | 16.36  | 19.94  | 19.26  | 26.37  | 28.09  | 28.16  | 25.22  |
| Chrng   | 0      | 0      | 0      | 0      | 0      | 0.03   | 0      | 0      | 0      | 0      | 0      | 0      |
| Mdm2    | 39.06  | 38.68  | 37.59  | 40.53  | 39.26  | 44.42  | 32.23  | 32.37  | 24.05  | 21.9   | 21.31  | 23.55  |
| Adam17  | 25.76  | 24.08  | 28.56  | 26.4   | 27.34  | 28.51  | 11.23  | 11.49  | 13.28  | 14.68  | 13.97  | 13.75  |
| Abat    | 0.92   | 0.77   | 0.62   | 0.34   | 0.4    | 0.55   | 0      | 0.03   | 0.04   | 0.01   | 0.03   | 0.04   |
| Oprk1   | 0      | 0.01   | 0      | 0.01   | 0      | 0.01   | 0      | 0      | 0      | 0      | 0      | 0.01   |
| Map2k1  | 43.02  | 41.72  | 46.62  | 38.96  | 39.45  | 39.06  | 77.41  | 76.04  | 57.2   | 59.41  | 59.52  | 57.1   |

|         |        |        |        |        |        |       |       |       |       |       |       |       |
|---------|--------|--------|--------|--------|--------|-------|-------|-------|-------|-------|-------|-------|
| Chrm3   | 0      | 0      | 0      | 0      | 0      | 0     | 0     | 0     | 0.04  | 0.04  | 0.06  | 0.06  |
| Srd5a2  | 0      | 0.08   | 0      | 0      | 0      | 0     | 0     | 0     | 0     | 0     | 0     | 0     |
| Cnr2    | 0.03   | 0.03   | 0      | 0.02   | 0      | 0     | 0     | 0     | 0     | 0     | 0     | 0     |
| Oprd1   | 0.02   | 0.02   | 0      | 0      | 0.03   | 0     | 0     | 0     | 0.02  | 0     | 0.02  | 0.01  |
| Nr3c2   | 0.1    | 0.09   | 0.14   | 0.07   | 0.09   | 0.11  | 0.01  | 0.01  | 0.03  | 0     | 0.03  | 0     |
| Src     | 13.24  | 14.66  | 17.93  | 15.97  | 17.61  | 19.44 | 15.71 | 15.43 | 14.21 | 13.56 | 14.42 | 14.74 |
| Gabrb2  | 0.49   | 0.56   | 0.65   | 0.44   | 0.57   | 0.46  | 0     | 0     | 0     | 0     | 0     | 0     |
| Maoa    | 24.4   | 24.22  | 26.27  | 24.29  | 24.69  | 23.76 | 29.16 | 27.51 | 21.83 | 20.38 | 19.92 | 23.81 |
| Prkca   | 15.32  | 16.28  | 18.31  | 17.19  | 17.01  | 17.32 | 11.57 | 12.66 | 13.76 | 13.5  | 13.77 | 14.2  |
| Kit     | 0      | 0      | 0      | 0      | 0      | 0     | 0     | 0     | 0     | 0     | 0     | 0     |
| Htr6    | 0.24   | 0.02   | 0.35   | 0.15   | 0.13   | 0.2   | 0.05  | 0.05  | 0.13  | 0.18  | 0.16  | 0.06  |
| Car5b   | 2.39   | 2.6    | 3.02   | 2.71   | 2.75   | 3.57  | 1.84  | 1.97  | 2.64  | 2.68  | 2.5   | 2.75  |
| Htr7    | 0.04   | 0      | 0.02   | 0      | 0      | 0.02  | 0     | 0     | 0     | 0     | 0     | 0     |
| Pik3cb  | 22.05  | 22.8   | 23.28  | 20.12  | 20.77  | 21.43 | 16.53 | 16.56 | 12.93 | 14.52 | 14.22 | 14.43 |
| Fyn     | 14.08  | 15.63  | 25.98  | 16.55  | 16.56  | 22.13 | 36.96 | 38.09 | 14.16 | 14.21 | 13.59 | 14.53 |
| Alpl    | 5.6    | 5.15   | 8.45   | 2.06   | 2.08   | 1.92  | 0.13  | 0.15  | 0.1   | 0.05  | 0.1   | 0.15  |
| Grin2b  | 0      | 0      | 0      | 0      | 0      | 0     | 0     | 0.01  | 0     | 0     | 0     | 0     |
| Mmp9    | 1.03   | 0.79   | 0.78   | 0.18   | 0.38   | 0.16  | 1.23  | 1.24  | 1.7   | 2.08  | 2.71  | 2.24  |
| Rps6ka3 | 18.39  | 18.31  | 21.96  | 22.5   | 22.63  | 22.61 | 38.68 | 39.75 | 31.65 | 31.01 | 30.43 | 32.7  |
| Agtr1a  | 0      | 0      | 0      | 0      | 0.03   | 0     | 0     | 0     | 0     | 0     | 0     | 0     |
| Zap70   | 0      | 0      | 0      | 0      | 0.05   | 0     | 0     | 0     | 0     | 0.05  | 0     | 0     |
| Kmo     | 0      | 0      | 0      | 0      | 0      | 0     | 0     | 0     | 0.05  | 0     | 0     | 0     |
| Pde5a   | 1.41   | 1.75   | 2.34   | 1.55   | 1.38   | 1.93  | 0.11  | 0.09  | 0.03  | 0.05  | 0.08  | 0.09  |
| Xiap    | 12.92  | 13.48  | 17     | 15.43  | 16.17  | 17.81 | 10.82 | 10.66 | 14.41 | 15.88 | 16.11 | 14.81 |
| Cnr1    | 6.43   | 6.72   | 5.84   | 6.95   | 7.13   | 6.57  | 0     | 0.01  | 0     | 0     | 0     | 0     |
| Pde2a   | 0.09   | 0.12   | 0.12   | 0.03   | 0.05   | 0.06  | 0.21  | 0.26  | 0.17  | 0.34  | 0.27  | 0.13  |
| App     | 293.37 | 301.53 | 379.18 | 324.52 | 334.88 | 351.3 | 95.69 | 93.03 | 79.12 | 85.12 | 86.99 | 82.42 |
| Trpc6   | 0.46   | 0.61   | 0.31   | 0.47   | 0.52   | 0.35  | 12.55 | 14.06 | 6.7   | 9.85  | 9.84  | 8.49  |
| Flt1    | 6.21   | 5.98   | 7.63   | 7.71   | 8.55   | 9.23  | 0.03  | 0.05  | 0.03  | 0.08  | 0.05  | 0.07  |
| Htr1d   | 0.02   | 0.05   | 0.02   | 0.02   | 0.05   | 0     | 0     | 0     | 0     | 0     | 0     | 0     |
| Ednra   | 0      | 0      | 0      | 0      | 0      | 0     | 3.39  | 3.82  | 3.7   | 4.6   | 4.52  | 4.1   |
| Adralb  | 0.89   | 1.25   | 1.07   | 1.57   | 0.92   | 0.97  | 0     | 0.02  | 0     | 0     | 0     | 0     |
| Hmgcr   | 18.89  | 19.08  | 15.87  | 20.1   | 19.51  | 18.68 | 8.17  | 8.47  | 19.56 | 20.98 | 22.15 | 22.22 |
| Cpt1a   | 47.34  | 47.83  | 51.68  | 47.75  | 49.31  | 49.71 | 18.8  | 19.17 | 31.11 | 32.69 | 33.24 | 32.34 |
| Ncstn   | 28.3   | 26.8   | 31.5   | 35.54  | 36.07  | 36.35 | 25.82 | 27.37 | 25.03 | 27.62 | 28.04 | 25.72 |
| Npy5r   | 0.05   | 0.06   | 0      | 0.08   | 0.03   | 0.08  | 0.03  | 0.08  | 0.26  | 0.19  | 0.08  | 0.21  |

|         |       |       |       |       |       |       |       |       |       |       |       |       |
|---------|-------|-------|-------|-------|-------|-------|-------|-------|-------|-------|-------|-------|
| Dpp9    | 36.42 | 35.75 | 31.05 | 31.11 | 32.49 | 29.98 | 27.74 | 26.6  | 33.81 | 31.18 | 32.22 | 32.34 |
| Pim2    | 7.45  | 7.47  | 7.19  | 8.07  | 7.49  | 7.57  | 2.59  | 2.41  | 3.89  | 3.35  | 4.14  | 2.98  |
| Igflr   | 6.23  | 7.18  | 7.89  | 8.19  | 8.29  | 7.71  | 5.48  | 5.5   | 7.72  | 8.47  | 8.34  | 7.39  |
| Pla2g10 | 0     | 0     | 0     | 0     | 0     | 0     | 0     | 0     | 0     | 0     | 0     | 0     |
| Prep    | 79.3  | 80.12 | 65.24 | 86.15 | 87.16 | 78.1  | 87.9  | 87.36 | 76.7  | 74.26 | 75.19 | 74.63 |
| Mapk10  | 0.01  | 0     | 0     | 0.02  | 0     | 0.03  | 0.02  | 0.1   | 0.08  | 0.05  | 0     | 0.05  |
| Sirt2   | 43.5  | 44.44 | 56.72 | 36.98 | 35.28 | 44.36 | 40.9  | 36.16 | 36.11 | 33.46 | 32.45 | 34.25 |
| Nos1    | 0.02  | 0.02  | 0.05  | 0.01  | 0.02  | 0.06  | 0.01  | 0.01  | 0.02  | 0.01  | 0.02  | 0.04  |
| Adora2a | 0.2   | 0.27  | 0.45  | 0.26  | 0.32  | 0.27  | 0.06  | 0     | 0     | 0.03  | 0     | 0.02  |
| Htr2b   | 0.11  | 0.17  | 0.1   | 0.08  | 0.12  | 0.16  | 0.04  | 0.09  | 0.13  | 0.08  | 0.05  | 0.09  |
| Chrnbl  | 7.27  | 7.11  | 8.89  | 8.17  | 8.32  | 9.83  | 5.25  | 4.71  | 3.63  | 3.02  | 3.43  | 3.61  |
| Chrn4   | 0.61  | 0.57  | 1.07  | 0.34  | 0.38  | 0.78  | 0.07  | 0.03  | 0     | 0     | 0     | 0.03  |
| Hsd11b1 | 0     | 0     | 0     | 0     | 0     | 0     | 0.1   | 0.57  | 1.39  | 0.89  | 0.58  | 1.09  |
| Polh    | 28.02 | 27.73 | 24.03 | 26.16 | 25.61 | 23.21 | 15.48 | 17.11 | 25.05 | 28.26 | 28.29 | 27.33 |
| Brd9    | 17.3  | 18.11 | 13.06 | 17.62 | 16.99 | 13.68 | 6.43  | 6.81  | 10.62 | 10.36 | 10.24 | 9.9   |
| Alk     | 0     | 0.01  | 0.02  | 0.01  | 0.01  | 0.01  | 0.05  | 0.01  | 0     | 0.01  | 0.01  | 0.04  |
| Chrna4  | 0     | 0     | 0.01  | 0     | 0     | 0     | 0     | 0     | 0     | 0     | 0     | 0     |
| Nr1h3   | 1.25  | 0.73  | 1.09  | 0.76  | 0.63  | 1.03  | 0.04  | 0.22  | 0.11  | 0.11  | 0     | 0     |
| Sigmar1 | 29.51 | 29.96 | 20.1  | 29.87 | 28.86 | 22.1  | 41.24 | 39    | 71.24 | 69.41 | 70.79 | 74    |
| Slpr2   | 8.85  | 9.54  | 10.39 | 13.43 | 13.49 | 11.8  | 9.04  | 8.37  | 13.33 | 13.51 | 13.61 | 12.54 |
| Soat2   | 0.1   | 0.21  | 0.29  | 0.21  | 0.24  | 0.32  | 1.97  | 2.52  | 0.17  | 0.06  | 0.17  | 0.04  |
| Senp8   | 1.9   | 2.3   | 3.38  | 2.42  | 2.55  | 3.51  | 3.9   | 3.67  | 2.96  | 2.92  | 3.25  | 3.24  |
| Cftr    | 1.71  | 2     | 2.18  | 1.8   | 1.91  | 2.58  | 0     | 0     | 0     | 0     | 0     | 0     |
| Ccr2    | 0     | 0     | 0     | 0     | 0     | 0     | 0     | 0.02  | 0     | 0     | 0     | 0     |
| Itk     | 0     | 0     | 0     | 0     | 0     | 0     | 0.01  | 0.01  | 0     | 0     | 0     | 0.05  |
| Pim3    | 33.88 | 32.86 | 43.08 | 27.48 | 28.79 | 37.07 | 58.36 | 59.35 | 32.6  | 33.8  | 33.48 | 32.68 |
| Oxtr    | 0     | 0     | 0     | 0.03  | 0     | 0.04  | 0.11  | 0.11  | 0.04  | 0.2   | 0.25  | 0.08  |
| Mapk14  | 34.48 | 32.7  | 35.56 | 40.81 | 39.51 | 39.33 | 28.31 | 27.83 | 34.89 | 34.77 | 35.53 | 35.48 |
| Polk    | 5.64  | 5.95  | 7.37  | 5.49  | 5.11  | 7.74  | 5.46  | 5.98  | 4.7   | 5.22  | 5.46  | 4.1   |
| Adra1d  | 0.5   | 0.43  | 0.59  | 0.18  | 0.24  | 0.22  | 0.16  | 0.2   | 0.2   | 0.26  | 0.21  | 0.33  |
| Porcn   | 2.16  | 2.32  | 2.63  | 1.44  | 1.65  | 1.81  | 6.48  | 7.52  | 7.24  | 5.62  | 4.83  | 5.94  |
| Nr1h2   | 32.78 | 35.48 | 34.45 | 30.31 | 28.41 | 30.71 | 16.86 | 17.3  | 27.16 | 29.64 | 28.76 | 24.07 |
| Car2    | 0.29  | 0.33  | 0.27  | 0.78  | 0.55  | 0.74  | 0     | 0.04  | 0     | 0     | 0.07  | 0     |
| Csnk2a1 | 58.94 | 61.96 | 62.89 | 60.83 | 61.06 | 63.6  | 51.07 | 51.56 | 47.84 | 50.16 | 49.38 | 48.82 |
| F10     | 0     | 0     | 0     | 0     | 0     | 0     | 0     | 0     | 0     | 0     | 0     | 0     |
| Aurkb   | 69.36 | 69.42 | 44.26 | 59.09 | 55.25 | 47.54 | 12.03 | 12.18 | 42.71 | 49.5  | 50.94 | 49.66 |

|         |        |        |       |       |       |       |       |       |        |        |        |        |
|---------|--------|--------|-------|-------|-------|-------|-------|-------|--------|--------|--------|--------|
| Cdc25b  | 33.5   | 35.96  | 35.07 | 34.61 | 33.83 | 36.16 | 23.12 | 23.41 | 34.9   | 35.67  | 34.93  | 36.57  |
| Ppard   | 18.33  | 18.8   | 21.01 | 16.76 | 17.26 | 18.76 | 27.13 | 25.66 | 40.24  | 36.94  | 38.73  | 36.68  |
| Grm2    | 0      | 0      | 0     | 0     | 0     | 0     | 0     | 0     | 0      | 0.02   | 0      | 0      |
| Akr1b8  | 61.24  | 57.63  | 54.72 | 57.14 | 55.32 | 53.14 | 63.89 | 66.1  | 110.65 | 109.01 | 112.71 | 108.07 |
| Impdh1  | 35.93  | 35.3   | 29.63 | 34.14 | 35.85 | 30.95 | 33.51 | 33.04 | 37.8   | 36.86  | 36.68  | 35.23  |
| Adora2b | 0.28   | 0.18   | 0.29  | 0.21  | 0.11  | 0.21  | 0.07  | 0.07  | 0      | 0.03   | 0.1    | 0.03   |
| Grm5    | 0      | 0      | 0     | 0     | 0     | 0     | 0     | 0     | 0      | 0      | 0      | 0      |
| Mapk8   | 11.99  | 12.38  | 13.05 | 11.34 | 11.25 | 12.89 | 9.78  | 10.39 | 9.23   | 9.25   | 9.06   | 10.33  |
| Chrna1  | 0      | 0.04   | 0.01  | 0.03  | 0     | 0.01  | 0.04  | 0     | 0.03   | 0.01   | 0.01   | 0      |
| Chrm1   | 0.52   | 0.68   | 0.72  | 0.18  | 0.12  | 0.29  | 0     | 0     | 0.01   | 0      | 0      | 0.01   |
| Pde4a   | 2.95   | 2.71   | 3.35  | 3.09  | 3.03  | 3.74  | 5.32  | 4.95  | 5.83   | 5.88   | 6.46   | 6.46   |
| Prkcd   | 25.57  | 26.07  | 27.19 | 28.65 | 28.64 | 27.2  | 18.86 | 18.67 | 21.93  | 22.14  | 23.09  | 18.89  |
| Aurka   | 103.43 | 103.41 | 61.59 | 99.1  | 90.43 | 72.67 | 41.73 | 42.15 | 60.55  | 61     | 58.62  | 61.58  |
| Jak1    | 42.13  | 42.54  | 43.55 | 45.07 | 43.83 | 46.02 | 70.12 | 70.65 | 71.94  | 70.46  | 70.28  | 70.55  |
| Dyrk2   | 13.88  | 14.55  | 16.58 | 20.01 | 18.94 | 15.96 | 20.71 | 21.23 | 21.7   | 21.71  | 22.52  | 19.94  |
| Ptges   | 0.15   | 0.17   | 0.24  | 0.17  | 0.15  | 0.09  | 0.9   | 1.06  | 1.52   | 1.17   | 1.15   | 0.98   |
| Itgav   | 50.96  | 54.12  | 58.26 | 52.59 | 55.53 | 50.85 | 32.62 | 34.39 | 32.26  | 33.42  | 33.37  | 31.33  |
| Mtor    | 7.07   | 7.26   | 8.01  | 7.23  | 7.37  | 7.77  | 9.4   | 9.24  | 9.01   | 8.84   | 9.02   | 9.28   |
| Psen2   | 3.39   | 3.66   | 5     | 3.65  | 3.35  | 4.89  | 3.49  | 2.85  | 1.85   | 1.54   | 2      | 2.19   |
| Cdk9    | 18.94  | 18.19  | 18.03 | 18.76 | 18.98 | 22    | 33.99 | 32.78 | 42.04  | 41.85  | 42.27  | 40.22  |
| Adrala  | 0.01   | 0      | 0     | 0     | 0     | 0     | 0.01  | 0     | 0      | 0.01   | 0      | 0      |
| Naaa    | 15.74  | 16.2   | 21.45 | 16.03 | 15.06 | 19.86 | 17.09 | 16.76 | 11.4   | 10.91  | 11.36  | 13.41  |
| Slc6a9  | 5.19   | 6.26   | 16.19 | 5.54  | 4.79  | 14.39 | 46.7  | 45.58 | 8.73   | 8.94   | 7.27   | 7.1    |
| Jak3    | 2.17   | 1.99   | 3.33  | 1.68  | 1.68  | 2.06  | 2.01  | 1.43  | 3.02   | 3.21   | 3.31   | 3.01   |
| Cd38    | 0      | 0      | 0     | 0     | 0     | 0     | 0     | 0.02  | 0      | 0      | 0      | 0      |
| Itga4   | 0.02   | 0      | 0.01  | 0     | 0.01  | 0.01  | 0     | 0     | 0      | 0      | 0      | 0      |
| Ccnd1   | 29.78  | 29.61  | 22.41 | 34.32 | 34.49 | 23.5  | 69.41 | 68.8  | 124.57 | 116.5  | 116.65 | 138.17 |
| Casp7   | 25.36  | 27.3   | 31.03 | 25.63 | 25.23 | 27.66 | 8.02  | 6.5   | 5.77   | 6.36   | 6.49   | 5.61   |
| Nqo1    | 7.82   | 7.05   | 6.38  | 9.24  | 9.76  | 8.47  | 4.65  | 3.53  | 12.31  | 7.05   | 7.28   | 12.38  |
| Slc6a3  | 0      | 0.02   | 0     | 0     | 0     | 0     | 0     | 0     | 0      | 0      | 0      | 0      |
| Pin1    | 16.44  | 15.2   | 13.33 | 15.08 | 15.15 | 14.48 | 14.48 | 14.69 | 13.01  | 13.72  | 13.61  | 13.92  |
| Tert    | 0      | 0      | 0     | 0     | 0.01  | 0.02  | 0.38  | 0.75  | 0.94   | 0.98   | 0.86   | 0.71   |
| Hdac1   | 84.13  | 81.3   | 74.13 | 94.73 | 96.7  | 89.02 | 56.15 | 59.68 | 73.95  | 74.62  | 69.04  | 79.96  |
| Kdm5a   | 11.04  | 11.8   | 14.38 | 10.71 | 12.06 | 14.06 | 10.05 | 11.21 | 6.93   | 7.71   | 7.75   | 6.73   |
| Adrb1   | 1.26   | 1.43   | 1.55  | 1.34  | 1.43  | 2.13  | 0     | 0     | 0      | 0      | 0      | 0      |
| Pdgfrb  | 1.23   | 1.39   | 2.16  | 1.03  | 0.65  | 1.34  | 2.45  | 2.48  | 3.54   | 3.94   | 4.65   | 2.56   |

|         |         |         |         |         |         |         |         |         |         |         |         |         |
|---------|---------|---------|---------|---------|---------|---------|---------|---------|---------|---------|---------|---------|
| Pde7a   | 9.05    | 9.02    | 9.33    | 8.89    | 9.01    | 9.05    | 12.73   | 11.82   | 12.46   | 13.52   | 11.73   | 10.87   |
| Tgfbr1  | 9.29    | 10.1    | 11.57   | 8.7     | 9.28    | 10.74   | 5.24    | 5.33    | 5.35    | 5.49    | 5.36    | 5.06    |
| Bace1   | 6.62    | 5.8     | 6.3     | 6.44    | 7.08    | 5.73    | 5.65    | 5.54    | 11.36   | 11.54   | 12.07   | 11.09   |
| Ppia    | 3701.25 | 3402.93 | 2765.02 | 3508.64 | 3446.47 | 3062.95 | 2519.71 | 2445.34 | 3109.77 | 3115.64 | 3030.57 | 3231.59 |
| Ros1    | 0.01    | 0.01    | 0.02    | 0       | 0       | 0       | 0.01    | 0       | 0       | 0       | 0       | 0       |
| Soat1   | 13.72   | 14.74   | 21.01   | 16.6    | 16.75   | 17.04   | 39.47   | 40.43   | 38.23   | 35.54   | 36.64   | 37.2    |
| Htr2c   | 0       | 0       | 0.02    | 0       | 0       | 0       | 0       | 0       | 0       | 0       | 0       | 0       |
| Pgr     | 0       | 0       | 0       | 0       | 0.01    | 0.01    | 1.43    | 1.26    | 0.85    | 1.27    | 1.25    | 1.16    |
| Ikbkb   | 14.21   | 15.58   | 16.3    | 16.45   | 16.5    | 19.17   | 29.26   | 27.14   | 23.69   | 25.27   | 25.98   | 23.74   |
| Maob    | 0.05    | 0       | 0.05    | 0.08    | 0       | 0.03    | 0       | 0.03    | 0       | 0       | 0       | 0       |
| Dyrk1a  | 9.36    | 11.41   | 11.54   | 11.87   | 12.05   | 13.54   | 13.39   | 13.16   | 11.04   | 10.17   | 10.47   | 10.33   |
| Faah    | 1.24    | 1.29    | 1.9     | 0.77    | 1.03    | 1.52    | 0.14    | 0.16    | 0.22    | 0.15    | 0.34    | 0.26    |
| Fdps    | 39.16   | 35.43   | 26.3    | 39.89   | 37.18   | 31.22   | 53.09   | 48.42   | 127.13  | 133.09  | 127.37  | 131.98  |
| Elane   | 0       | 0.08    | 0       | 0       | 0       | 0       | 0       | 0       | 0       | 0       | 0       | 0.07    |
| Gck     | 0.05    | 0       | 0.03    | 0.05    | 0       | 0.11    | 0       | 0       | 0       | 0       | 0       | 0       |
| Chrnd   | 0       | 0       | 0       | 0       | 0       | 0       | 0.02    | 0       | 0       | 0       | 0       | 0       |
| G6pdx   | 46.7    | 43.3    | 28.9    | 46.69   | 44.28   | 31.73   | 98      | 97.93   | 96.89   | 89.9    | 90.96   | 94.79   |
| Parp1   | 49.67   | 48.95   | 45.86   | 45.37   | 48.28   | 48.36   | 33.13   | 32.67   | 47.94   | 45.47   | 45.99   | 46.99   |
| Hdac10  | 4.02    | 3.94    | 4.25    | 3.45    | 3.01    | 2.83    | 2.67    | 2.89    | 3.61    | 3.22    | 3.59    | 3.4     |
| F7      | 0       | 0       | 0       | 0       | 0       | 0       | 0       | 0.04    | 0       | 0       | 0       | 0       |
| Ptk2    | 38.74   | 37.62   | 39.79   | 40.05   | 40.57   | 40.32   | 41.39   | 41.03   | 43.28   | 41.05   | 41.31   | 43.54   |
| Atr     | 7.59    | 8.7     | 10.92   | 6.97    | 7.95    | 9.17    | 8.51    | 10.13   | 5.41    | 5.06    | 6.22    | 6.28    |
| Bcl2    | 1.27    | 1.48    | 2.57    | 1.48    | 1.92    | 2.44    | 1.79    | 1.9     | 2.24    | 2.22    | 2.1     | 2.32    |
| Fgr     | 0       | 0       | 0       | 0       | 0       | 0       | 0       | 0       | 0       | 0       | 0       | 0       |
| Pla2g2e | 0.17    | 0.25    | 0.52    | 0.1     | 0.09    | 0.53    | 1.86    | 2.33    | 0.18    | 0.27    | 0.08    | 0.19    |
| Gabra1  | 5.15    | 5.03    | 4.91    | 9.99    | 9.4     | 7.38    | 0       | 0       | 0       | 0       | 0       | 0       |
| Car12   | 1.24    | 1.42    | 2.2     | 1.07    | 1.42    | 1.13    | 28.2    | 28.42   | 28.54   | 30.89   | 29.48   | 28.05   |
| Tacr3   | 0       | 0       | 0.05    | 0       | 0.02    | 0.02    | 0       | 0       | 0       | 0       | 0       | 0       |
| Asah1   | 58.33   | 57.84   | 98.01   | 65.88   | 66.08   | 84.56   | 134.13  | 140.89  | 107.6   | 117.9   | 117.4   | 109.76  |
| Mtnr1a  | 0.04    | 0       | 0       | 0       | 0       | 0       | 0       | 0       | 0       | 0       | 0       | 0       |
| Ace     | 0.01    | 0       | 0.02    | 0.04    | 0       | 0.02    | 0.02    | 0       | 0       | 0       | 0       | 0       |
| Grin1   | 0.02    | 0.02    | 0       | 0       | 0       | 0.05    | 0.03    | 0       | 0       | 0.02    | 0.02    | 0       |
| Cckar   | 0       | 0       | 0       | 0       | 0.02    | 0       | 0       | 0       | 0.02    | 0       | 0.04    | 0       |
| Ltb4r1  | 0.05    | 0.06    | 0       | 0       | 0.11    | 0.06    | 0.03    | 0       | 0.05    | 0       | 0.05    | 0.05    |
| Braf    | 6.97    | 8.15    | 10.15   | 7.7     | 7.52    | 10.14   | 8.01    | 8.48    | 5.64    | 5.55    | 5.68    | 5.41    |
| Ccne1   | 16.87   | 16.63   | 12.25   | 18.7    | 18.03   | 13.26   | 19.66   | 19.51   | 33.88   | 36.39   | 35.96   | 38.26   |





|         |        |        |        |        |        |        |        |        |        |        |        |        |
|---------|--------|--------|--------|--------|--------|--------|--------|--------|--------|--------|--------|--------|
| Cyp2c66 | 0      | 0      | 0      | 0      | 0      | 0      | 0      | 0      | 0      | 0      | 0      | 0      |
| Slc6a2  | 0      | 0      | 0      | 0      | 0      | 0      | 0.02   | 0.02   | 0.06   | 0.04   | 0.11   | 0.07   |
| Sphk2   | 10.4   | 11.13  | 10.75  | 10.13  | 10.37  | 9.97   | 12.35  | 12.4   | 9.14   | 9.49   | 8.7    | 9.48   |
| Mc3r    | 0      | 0      | 0      | 0      | 0      | 0      | 0      | 0      | 0      | 0      | 0.02   | 0.07   |
| ErbB4   | 0.04   | 0.04   | 0.12   | 0.07   | 0.07   | 0.15   | 0      | 0      | 0      | 0      | 0      | 0      |
| Cts1    | 407.9  | 378.2  | 503.74 | 485.16 | 477.49 | 508.66 | 538.08 | 527.59 | 560.25 | 526.76 | 510.45 | 503.46 |
| Mme     | 14.4   | 14.84  | 22.74  | 23.44  | 23.09  | 21.63  | 0.01   | 0      | 0      | 0      | 0.01   | 0      |
| Poli    | 10.02  | 10.8   | 13.62  | 10.99  | 11.9   | 15.74  | 8.22   | 8.1    | 5.36   | 6.64   | 6.08   | 6.25   |
| Tubb1   | 0      | 0      | 0      | 0      | 0      | 0      | 0      | 0      | 0      | 0      | 0      | 0      |
| Plk1    | 77.93  | 76.31  | 43.04  | 65.72  | 63.79  | 42.3   | 33.12  | 30.82  | 65.48  | 69.75  | 66.75  | 73.4   |
| S1pr3   | 0.01   | 0.06   | 0      | 0.01   | 0.06   | 0.06   | 0      | 0      | 0      | 0      | 0      | 0.01   |
| Tacr2   | 0.33   | 0.42   | 0.37   | 0.48   | 0.26   | 0.52   | 0.11   | 0.14   | 0      | 0      | 0.06   | 0.03   |
| Top1    | 62.11  | 63.85  | 47.87  | 69.45  | 66.21  | 48.82  | 59.53  | 60.48  | 58.42  | 59.66  | 56.04  | 56.79  |
| Abcb1b  | 11.44  | 12.04  | 12.3   | 9.34   | 9.15   | 10.78  | 33.61  | 33.83  | 20.49  | 18.42  | 19.04  | 21.58  |
| Prkdc   | 2.69   | 2.77   | 4.32   | 3.05   | 3.39   | 4      | 3.95   | 4.32   | 2.94   | 3.08   | 3.35   | 2.97   |
| Bcat2   | 11.21  | 10.68  | 10.42  | 11.4   | 11.47  | 12.7   | 11.37  | 10.43  | 13.21  | 13.25  | 15.11  | 12     |
| Car9    | 0.1    | 0.29   | 0.53   | 0.21   | 0.26   | 0.34   | 0.4    | 0.28   | 0.13   | 0.29   | 0.37   | 0.22   |
| Scd2    | 50.58  | 49.77  | 47.68  | 65.17  | 65.82  | 47.98  | 88.05  | 89.96  | 271.82 | 276    | 277.37 | 273.77 |
| Tph1    | 0.36   | 0.41   | 0.27   | 0.36   | 0.23   | 0.26   | 0.89   | 0.43   | 0.6    | 0.26   | 0.44   | 0.83   |
| Khk     | 5.14   | 6.69   | 10.62  | 7.19   | 6.4    | 8.49   | 2.2    | 2.29   | 2.43   | 1.86   | 3.09   | 1.73   |
| Rock2   | 28.7   | 30.94  | 36.51  | 31.6   | 32.57  | 34.27  | 32.72  | 34.31  | 28.08  | 27.8   | 26.83  | 29.58  |
| Aoc3    | 0.07   | 0.1    | 0.1    | 0.15   | 0.12   | 0.03   | 0.05   | 0.19   | 0.05   | 0.07   | 0.02   | 0.05   |
| Rock1   | 19.15  | 21.64  | 21.21  | 24.57  | 24.64  | 25.53  | 8.5    | 9.35   | 10.54  | 9.89   | 10.53  | 9.68   |
| Dyrk1b  | 3.35   | 3.2    | 4.01   | 2.61   | 2.62   | 3.67   | 0.96   | 0.77   | 2.38   | 2.27   | 1.96   | 1.95   |
| Tlr4    | 2.43   | 2.04   | 2.77   | 3.15   | 3.72   | 2.64   | 8.2    | 8.76   | 6.53   | 7.07   | 6.57   | 6.8    |
| Alox12  | 0.04   | 0      | 0.04   | 0      | 0      | 0      | 0      | 0      | 0      | 0      | 0      | 0      |
| Carm1   | 45.18  | 45.36  | 41.2   | 41.51  | 40.12  | 37.71  | 67.89  | 66.85  | 59.07  | 60.16  | 60.28  | 63.48  |
| Adra2a  | 0      | 0.13   | 0.05   | 0.08   | 0.08   | 0.02   | 0.05   | 0.06   | 0.11   | 0.02   | 0.16   | 0.14   |
| Ret     | 0.02   | 0      | 0      | 0      | 0      | 0      | 0      | 0      | 0.01   | 0      | 0.01   | 0      |
| Aph1a   | 32.17  | 31.65  | 34.49  | 32.97  | 35.82  | 36.6   | 23.18  | 22.21  | 28.62  | 31.73  | 31.25  | 32.55  |
| Mc5r    | 0.01   | 0.06   | 0      | 0      | 0      | 0      | 0.11   | 0.04   | 0.06   | 0.03   | 0.01   | 0      |
| Car5a   | 0.39   | 0.32   | 0.22   | 0.37   | 0.18   | 0.39   | 0.38   | 0.16   | 0.11   | 0.16   | 0      | 0.18   |
| Cdk4    | 351.66 | 334.99 | 360.05 | 312.88 | 299.43 | 319.36 | 388.77 | 376.73 | 430.61 | 408.18 | 397.66 | 415.63 |
| Icmt    | 12.16  | 12.67  | 13.12  | 12.92  | 12.97  | 13.02  | 8.07   | 8.58   | 12.5   | 12.25  | 13.42  | 13.25  |
| Hdac3   | 36.24  | 38.4   | 36.93  | 38.1   | 36.85  | 37.25  | 53.82  | 56.02  | 63.03  | 66.58  | 65.61  | 62.44  |
| Scn3a   | 0.14   | 0.18   | 0.3    | 0.28   | 0.33   | 0.26   | 0      | 0.03   | 0.03   | 0      | 0.01   | 0.01   |

|         |        |        |        |        |       |        |        |        |        |       |       |        |
|---------|--------|--------|--------|--------|-------|--------|--------|--------|--------|-------|-------|--------|
| Gper1   | 0.05   | 0.08   | 0.13   | 0.05   | 0.03  | 0      | 0      | 0.02   | 0      | 0.03  | 0.07  | 0      |
| Ehmt2   | 44.75  | 47.31  | 52.69  | 40.72  | 39.98 | 42.25  | 36.51  | 36.2   | 53.57  | 53.53 | 57.8  | 54.1   |
| Mmpla   | 0      | 0      | 0      | 0      | 0     | 0      | 0      | 0      | 0      | 0     | 0.03  | 0      |
| Akt3    | 6.58   | 7.41   | 11.57  | 9.07   | 8.93  | 11.6   | 19.35  | 20.17  | 16.88  | 19.7  | 19.69 | 15.47  |
| F2      | 0.03   | 0      | 0      | 0.03   | 0.06  | 0      | 0      | 0      | 0      | 0     | 0     | 0.03   |
| Casp1   | 0      | 0.09   | 0.04   | 0.09   | 0     | 0.04   | 0.04   | 0.04   | 0.16   | 0.09  | 0.04  | 0.17   |
| Brpf1   | 14.25  | 14     | 13.87  | 15.16  | 15.15 | 14.44  | 13.11  | 12.51  | 13.82  | 14.1  | 15.09 | 13.84  |
| Pik3ca  | 7.91   | 7.65   | 8.7    | 7.57   | 7.33  | 7.85   | 9.6    | 9.48   | 12.96  | 13.7  | 12.9  | 12.78  |
| Nr3c1   | 14.04  | 14.36  | 21.51  | 18.48  | 18.79 | 19.74  | 41.25  | 40.07  | 25.93  | 24.34 | 24.4  | 24.31  |
| Gabrg2  | 0      | 0      | 0      | 0      | 0.02  | 0      | 0      | 0      | 0      | 0     | 0     | 0      |
| Met     | 34.48  | 35.46  | 35.81  | 28.12  | 30.45 | 26.29  | 15.57  | 14.63  | 21.28  | 21.37 | 21.19 | 23.22  |
| Pim1    | 11.56  | 11.07  | 18.59  | 11.87  | 11.73 | 15.56  | 30.79  | 29.28  | 14.21  | 16.3  | 15.18 | 14.79  |
| Ednrb   | 0      | 0      | 0      | 0      | 0     | 0      | 0      | 0      | 0      | 0     | 0     | 0      |
| Slc6a4  | 0.07   | 0.02   | 0.07   | 0.02   | 0.05  | 0.07   | 0.07   | 0.02   | 0      | 0.02  | 0.09  | 0.02   |
| Gsk3a   | 67.84  | 65.61  | 58.67  | 59.47  | 59.34 | 62.3   | 41.85  | 40.37  | 56.23  | 51.39 | 52.15 | 54.66  |
| Psen1   | 29.01  | 29.42  | 32.96  | 30.48  | 30.61 | 34.6   | 26.5   | 24.98  | 22.19  | 22.29 | 22.45 | 20.7   |
| Mitf    | 0.78   | 0.52   | 1.16   | 0.38   | 0.36  | 0.63   | 3.21   | 3.24   | 1.81   | 2.36  | 2.28  | 1.79   |
| Hrh3    | 0      | 0      | 0      | 0      | 0     | 0.03   | 0      | 0      | 0      | 0     | 0     | 0      |
| Akr1b3  | 152.13 | 143.87 | 112.99 | 132.73 | 134   | 121.5  | 302.14 | 304.1  | 284.78 | 279.5 | 281.8 | 304.91 |
| Adam10  | 56.15  | 55.93  | 61.44  | 44.88  | 43.7  | 40.88  | 30.06  | 29.99  | 35.2   | 36.42 | 35.4  | 36.09  |
| Ar      | 0      | 0      | 0      | 0      | 0     | 0      | 2.79   | 3.04   | 2.89   | 3.29  | 3.54  | 3.24   |
| Mapk3   | 85.08  | 85.01  | 119.3  | 89.35  | 88.59 | 100.47 | 58.46  | 55.63  | 76.57  | 76.43 | 77.31 | 65.97  |
| Ccr9    | 0.03   | 0      | 0      | 0      | 0     | 0      | 0      | 0      | 0      | 0     | 0     | 0      |
| Lyn     | 1.2    | 1.42   | 1.76   | 2.48   | 1.99  | 2.55   | 0.2    | 0.12   | 0.17   | 0.31  | 0.37  | 0.15   |
| Car1    | 0      | 0      | 0      | 0      | 0     | 0      | 0      | 0      | 0.05   | 0     | 0     | 0      |
| Raf1    | 44.15  | 43.31  | 49.1   | 42.26  | 42.8  | 49.85  | 37.52  | 37.67  | 33.67  | 33.58 | 33    | 35.12  |
| Kdmla   | 43.7   | 42.45  | 46.89  | 38.45  | 40.08 | 43.29  | 50.14  | 50.7   | 46.17  | 45.98 | 47.62 | 45.94  |
| Htr2a   | 0      | 0      | 0      | 0      | 0     | 0      | 9.62   | 8.91   | 11.08  | 8.9   | 9.56  | 11.48  |
| Grial   | 0      | 0      | 0      | 0      | 0     | 0      | 0      | 0.01   | 0      | 0     | 0     | 0      |
| Psenen  | 90.06  | 85.99  | 105.67 | 94.66  | 82.78 | 92.78  | 114.48 | 106.97 | 84.55  | 81.77 | 87.39 | 78.47  |
| Ccr5    | 0      | 0      | 0      | 0      | 0     | 0      | 0.02   | 0.02   | 0      | 0     | 0     | 0      |
| Pparg   | 2.2    | 1.84   | 1.92   | 0.84   | 1.02  | 0.61   | 0      | 0      | 0      | 0     | 0     | 0      |
| Fgfr1   | 3.56   | 4.53   | 3.98   | 2.48   | 2.37  | 2.18   | 43.86  | 43.08  | 37.59  | 39.43 | 40.8  | 37.52  |
| Tlr7    | 0.24   | 0.23   | 0.25   | 0.27   | 0.41  | 0.23   | 0.83   | 0.62   | 1.44   | 1.06  | 0.93  | 0.82   |
| Slpr1   | 1.02   | 0.91   | 1.3    | 1.19   | 1     | 0.8    | 0.91   | 1.21   | 1.91   | 1.73  | 1.78  | 1.58   |
| Pla2g4a | 11.28  | 11.02  | 13.09  | 11.85  | 12.48 | 11.53  | 52.43  | 53.52  | 54.05  | 58.05 | 57.59 | 51.27  |

|         |       |       |       |       |       |        |       |       |       |       |       |       |
|---------|-------|-------|-------|-------|-------|--------|-------|-------|-------|-------|-------|-------|
| Tbxa2r  | 0.2   | 0.36  | 0.22  | 0.67  | 0.54  | 0.64   | 0.03  | 0     | 0     | 0     | 0     | 0.03  |
| Grm4    | 0     | 0.02  | 0     | 0     | 0     | 0      | 0     | 0     | 0     | 0     | 0     | 0     |
| Pik3cg  | 0.01  | 0     | 0.01  | 0     | 0     | 0      | 0     | 0.01  | 0     | 0.01  | 0     | 0     |
| Wdr5    | 26.34 | 27.13 | 29.79 | 26.06 | 25.29 | 29.17  | 37.99 | 36.91 | 30.71 | 30.95 | 29.62 | 29.86 |
| Mgl1    | 0.45  | 0.59  | 0.79  | 0.25  | 0.34  | 0.76   | 0.11  | 0.02  | 0.02  | 0.05  | 0.11  | 0.02  |
| P2rx7   | 12.79 | 13.81 | 19.43 | 13.57 | 13.82 | 15.18  | 5.06  | 4.54  | 0.27  | 0.19  | 0.31  | 0.14  |
| Pde10a  | 0.01  | 0.01  | 0.02  | 0.02  | 0.01  | 0.03   | 9.58  | 9.48  | 7.15  | 7.23  | 7.7   | 7.04  |
| Trpc3   | 0.08  | 0.05  | 0     | 0.02  | 0     | 0      | 0     | 0     | 0     | 0     | 0     | 0     |
| Thrb    | 0     | 0     | 0     | 0     | 0     | 0      | 0     | 0     | 0     | 0     | 0     | 0     |
| Adora1  | 0.01  | 0.01  | 0.03  | 0.01  | 0.06  | 0.01   | 0     | 0     | 0     | 0     | 0     | 0     |
| Cyp19a1 | 0     | 0     | 0     | 0     | 0     | 0      | 0     | 0     | 0     | 0     | 0     | 0     |
| Avpr1a  | 0     | 0.02  | 0     | 0     | 0.02  | 0.05   | 0     | 0     | 0     | 0     | 0     | 0     |
| Alox5ap | 2.54  | 2.41  | 2.58  | 2     | 2.07  | 2.69   | 0.4   | 0.29  | 0.83  | 1.78  | 1.68  | 0.99  |
| Hsd17b2 | 0     | 0     | 0     | 0     | 0     | 0      | 0     | 0     | 0     | 0     | 0     | 0     |
| Abl1    | 16.61 | 16.85 | 18.27 | 17.37 | 17.4  | 16.23  | 9.05  | 8.25  | 13.19 | 13.01 | 13.78 | 12.57 |
| Cxcr2   | 0.16  | 0.22  | 0.13  | 0.12  | 0.14  | 0.11   | 0.18  | 0.16  | 0.15  | 0.15  | 0.06  | 0.12  |
| Stat3   | 31.07 | 31.96 | 41.58 | 31.55 | 31.07 | 35.63  | 34.21 | 32.62 | 37.9  | 39.83 | 43.26 | 34.19 |
| ErbB2   | 11.04 | 11.03 | 10.92 | 10.39 | 10.8  | 10.67  | 5.65  | 5.45  | 7.23  | 7.52  | 7.67  | 7.11  |
| Mmp13   | 1.14  | 0.85  | 1.13  | 0.35  | 0.45  | 0.36   | 3.88  | 4.4   | 2.08  | 3.14  | 3.34  | 2.17  |
| Esrl    | 0.46  | 0.74  | 0.8   | 0.19  | 0.29  | 0.48   | 7.73  | 7.87  | 9.17  | 9.35  | 9.19  | 10.47 |
| Ctss    | 0     | 0     | 0     | 0     | 0.05  | 0      | 0     | 0.05  | 0     | 0     | 0.06  | 0     |
| Car7    | 0.88  | 0.63  | 1.11  | 1.22  | 0.73  | 1.22   | 0.88  | 0.72  | 0.29  | 0.56  | 0.41  | 0.38  |
| ChrnB2  | 0.04  | 0.03  | 0.05  | 0.03  | 0.03  | 0.13   | 0.08  | 0.14  | 0.12  | 0.1   | 0.06  | 0.11  |
| Cdk1    | 68.73 | 64.95 | 52.54 | 66.39 | 66.13 | 54.6   | 23.84 | 23.85 | 40.78 | 42.1  | 42.48 | 44.09 |
| Mapk1   | 85.67 | 82.92 | 88.83 | 94.54 | 98.44 | 102.55 | 79.82 | 82.02 | 77.54 | 80.28 | 74.64 | 78.15 |
